# Supplementary material for: Valorization of Fish Processing By-Products: Microstructural, Rheological, Functional, and Properties of Silver Carp Skin Type I Collagen
Source: MDPI journal article supplement (doi:10.3390/foods11192985), 2022-09-24
Supplement: s1 [file s1]

# Valorization of fish processing by-products: microstructural, rheological, functional, and properties of silver carp skin type I collagen

Yongxin Guan<sup>1,2</sup>, Jianlin He<sup>2</sup>, Junde Chen<sup>2,\*</sup>, Yushuang Li<sup>2</sup>, Xingkun Zhang<sup>2</sup>, Yan Zheng<sup>2</sup>, Linyan Jia<sup>1,\*</sup>

1 College of Chemistry and Chemical Engineering, Mudanjiang normal University, Mudanjiang 157011, China

2 Technical Innovation Center for Utilization of Marine Biological Resources, Third Institute of Oceanography, Ministry of Natural Resources, Xiamen 361005, China

\* Correspondence: jdchen@tio.org.cn (J.C.); 1002002@mdjnu.edu.cn (L.J.);  
Tel./Fax: +86-592-215527 (J.C.); +86-453-6426868 (L.J.)

## Supplementary Materials

**Figure S1.** Amino acid sequence of *Hypophthalmichthys molitrix* type I collagen subunit  $\alpha 1$ . Bold red peptides: Matched peptide in the NCBI database.

**Figure S2.** Amino acid sequence of *Hypophthalmichthys molitrix* type I collagen subunit  $\alpha 2$ . Bold red peptides: Matched peptide in the NCBI database.

**Figure S3.** Zeta potential of SCSC.

1 MFSFVDIRLA LLLSATVLLA RGQGEDDRTG GSCTLDGQVY NDRDVWKPEP←  
51 CQICVCDSGT VMCDEVICED TTDCPNPVIP HDECCPVCPD DDFQEPSVEG←  
101 PRGTPGEKGD RGPPGPPGND GIPGQPLPG PPGPPGPPGL GGNFSPQMSG←  
151 GFDEK**SGGAM AVPGPMGPMG PRGPPGPPGT** PGPQGFTGPP GEPGEAGAPG←  
201 PMGPRGAAGP PGKNGEDGES GKPGRPGERG PPGPQGARGF PGTPGLPGIK←  
251 GHR**GFSGLDG AKGDTGPSGP KGEAGAPGEN** GTPGAMGPRG LPGERGRAGP←  
301 PGAAGARGND GAAGAAGPPG PTGPAGPPGF PGGPGAK**GEV GPQGARGAEG**←  
351 PQGARGEAGN PGPAGPAGPA GNNGADGAAG PKGSPGTPGI AGAPGFPGPR←  
401 GPPGPSGAAG APGPKGNTGE VGAPGAKGEA GAKGEAGAQQ VQGPPGPPGE←  
451 EGKRGARGE P GAAGGR**GPPG ERGAPGARGF** PGADGSAGPK GAPGERGGPG←  
501 VVGPK**GATGE PGRNGEPMG GSKGMTGSPG SPGPDGKTGP SGTGQDGRP**←  
551 **GPPGPVGARG** QPGVMGFPGP KGAAGEAGKP GER**GVMGAVG ATGAPGKDGD**←  
601 VGAPGAPGPA GPAGERGEQG PAGPPGFQGL PGPQGATGEP GKSSEQGLPG←  
651 EAGAPGPSGS RGDGRFPGER GAPGPAGPAG ARGSPGSAGN DGAKGDSGAP←  
701 GAPGAQGPPG LQGMPPERGA AGLPGLKGDR GDQGA**KGTDG APGKDGI**RG←  
751 TGPIGPPGPA GAPGDKGETG APGLVGPAGA RGPPGERGET GAPGPAGFAG←  
801 PPGADGLPGA **KGEAGDN**AK **GDAGPPGPSG ATGAPGPQG**P **VGATGPKGAR**←  
851 GAAGPPGATG FPGAAGRVGP PGPAGNAGPP GPPGPAGKEG QKGSRGETGP←  
901 AGRTGEIGTP GPPGAPGEK**G TPGAEGPTGP SGTGPGQGIN** **QQRGIVGLPG**←  
951 **QRGERGF**PGL PGPSGEPGK**Q GPSGSPGERG PPGPMGPPGL** **AGPPGEPGRE**←  
1001 **GTPGNEGSAG** RDGAPGPKGD RGETGAAGTP GAPGPPGAPG PIGPACK**TGD**←  
1051 **RGESGPAGPS GAVGLTGPRG PVGPAGARGD** KGETGEAGER GMKGHRGFTG←  
1101 IQGPPGPPGP SGEPGPAGAS GPAGPRGPAG SSGPAGK**DCM SGLPGPIGPP**←  
1151 **GPRGRNGEIG** PAGPPGAPGP PGPPGPSGGG FDIGFIAQPQ EKAPDPFRHF←  
1201 RADDANVMRD RDLEVDTTLK SLSQQIESIM SPDGTKKNPA RTCRDLKMCH←  
1251 PDWKSGEYWI DPDQGCNQDA IKVYCNMETG ETCVYPTST IPKKNWYTSK←  
1301 NIKKKHVWF GEAMTDGFQF EYGSEGSKAE DVNIQLTFLR LMSTEASQNI←  
1351 TYHCKNSIAY MDQASGNLKK ALLLQGSNEI EIRAEGNSRF TYSVTEDGCT←  
1401 SHTGAWGKTV IDYKTTKTSR LPIIDIAPMD VGAPNQEFGI EVGPVCFL←

**Figure S1.** Amino acid sequence of *Hypophthalmichthys molitrix* type I collagen subunit  $\alpha 1$ . Bold red peptides: Matched peptide in the NCBI database.

1    MLSFVDTRIL    LLLAVTSYLA    SCQSSTRGPK    GPRGERGPKG    PDGKPGKPGL←  
 51    PGPPGPPGPP    GLGGNFAAQY    DGAK**GIEAGP**    **GPMGLMGPRG**    PSGPPGAPGP←  
 101    QGFQGHAGEP    GEPGQAGAVG    SRGPPGPPGK    NGEDGNNGRP    GKPGDRGAPG←  
 151    AQGARGFPGT    PGLPGMKGHR    **GYTGLDGRKG**    EPGAAGAKGE    NGAPGSNGTP←  
 201    GQRGGRGLPG    ERGR**VGPSGP**    **AGAR**GADGNI    GPAGPAGPLG    AAGLPGFPGA←  
 251    PGP**KGEIGPA**    **GPTGPSGPQG**    **QR**GEPGTNGA    VGPAGPPGNP    GANGINGAKG←  
 301    AAGPPGVAGA    PGFPGPRGGP    GPQGPSGASG    PR**GLAGDPGP**    **VGVKGD**SGVK←  
 351    **GEPGSAGPQG**    **PPGPSGEEGK**    **RGSTGEQGST**    **GPLGMR**GPRG    AAGTRGLPGL←  
 401    AGR**SGPMGMP**    **GARGAT**GAPG    ARGPPGDAGR    **AGEPGLVGAR**    GLPGSPGSSG←  
 451    PPG**KEGPAGP**    **AGQDGRSGPP**    **GPTGPR**GQPG    NIGFPGPKGP    SGEPGKPGEK←  
 501    **GPTGPTGLRG**    QPGPDGNNGP    PGPVGLAGAP    GEKGEQGPGS    APGFQGLPGL←  
 551    AGPAGEAGKS    GDR**GIPGDQG**    **AQGPAGVKGE**    **RGNPGPAGAA**    **GAQGPIGARG**←  
 601    **PAGTPGPDGN**    **KGEPGA**VGAA    **GAAGHQGAAG**    **MPGER**GAAGT    PGP**KGEKGEQ**←  
 651    GYR**GLEG**NAG    **RDGARG**APGP    SGPPGPAGAN    GDKGETGSFG    PPGPAGARGA←  
 701    PGER**GESGPA**    **GPSGFAGPPG**    **ADGQTGQRGE**    KGPAGVKGDA    GPPGPAGPAG←  
 751    NTGPLGPSGP    VGPPGARGDS    GPPGLTGFPG    AAGRVGPPGP    SGIVGPAGPT←  
 801    GAPGKDGPGR    AR**GDVGPAGP**    **PGENGMMGPP**    **GLAGEK**GSPG    ESGAPGAPGP←  
 851    AGPQQQLGSQ    GFNGLPGSRG    DRGLPGGPGA    VGDAGRVGPA    GAPGAR**GPAG**←  
 901    **NIGMPGMTGP**    **QGEAGREGSP**    **GNDGPPGRPG**    **AAGLKGD**RGE    PGSPGAAGPV←  
 951    GAPGPNGPSG    AVGRPGNR**GE**    **SGPSGSSGPV**    **GPAGARGAPG**    **PAGPR**GEKGV←  
 1001    AGDKGERGMK    GLRGHPGLQG    MPGPNGPSGD    SGPAGIAGPA    GPR**GPAGPNG**←  
 1051    **PPGK**DGSNGM    PGAIGPPGHR    GPPGYVGPAG    PPGSPGLPGP    PGQAGGGYDT←  
 1101    SGGYDEYRAD    QASLRAKDYE    VDATVKSLNT    QIENLLSPEG    SKKNPARTCR←  
 1151    DIRLSHPEWS    SGFYWIDPNQ    GCTMDAIKAY    CDFSTGQTCI    HPHPESIPQK←  
 1201    NWKSSQEKK    HIWFGETING    GTEFSYNDET    LSPQSMATQL    AFMRLLANQA←  
 1251    VQNITYHCKN    SIAYMDAENG    NLKKAVLLQG    SNDVELRAEG    NSRFTFSVLE←  
 1301    DGCSRHTGQW    GKTVIEYRTN    KPSRLPILDI    APLDIGGADQ    EFGLDIGPVC←  
 1351    FK←

**Figure S2.** Amino acid sequence of Hypophthalmichthys molitrix type I collagen subunit  $\alpha 2$ . Bold red peptides: Matched peptide in the NCBI database.

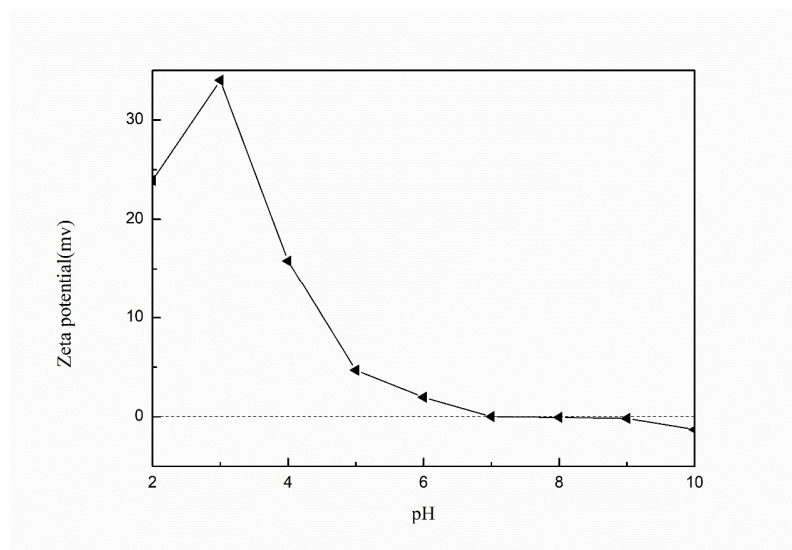

**Figure S3.** Zeta potential of SCSC.
